# Supplementary material for: Intra-articular TSG-6 delivery from heparin-based microparticles reduces cartilage damage in a rat model of osteoarthritis
Source: Royal Society of Chemistry journal article supplement (doi:10.1039/c8bm00010g), 2018-01-01
Supplement: c8bm00010g1.pdf [file c8bm00010g1.pdf]

### Figure S1. Proton nuclear magnetic resonance

**Methods:** Proton nuclear magnetic resonance ( $^1\text{H}$  NMR) was performed whereby 10 mg/mL Hep<sup>N</sup> MAm and PEGDA samples were each dissolved in deuterated  $\text{H}_2\text{O}$  (Sigma), run on a Bruker Avance III spectrometer at 400 Hz, and analyzed using iNMR software.<sup>35</sup> Percent modification was determined by dividing the integral of the methacrylamide peak by the heparin peak for Hep<sup>N</sup> MAm and the acrylate peaks by the PEG peak for PEGDA.

**Results:** Using  $^1\text{H}$  NMR analysis, PEGDA was determined to be ~55% functionalized (Figure S1A) and Hep<sup>N</sup> methacrylamide was determined to be 22-28% functionalized (Figure S1B).

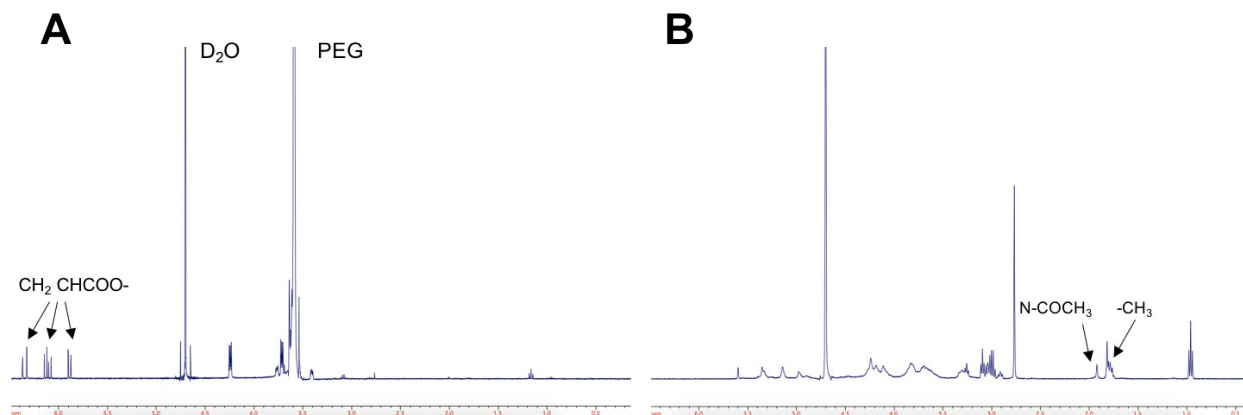

**Figure S1.  $^1\text{H}$  NMR of poly (ethylene glycol) diacrylate and N-desulfated heparin methacrylamide.** (A) Characteristic peaks for acrylate groups were present in the PEGDA spectra and (B) characteristic peaks for methacrylamide peaks were present in the N-desulfated heparin methacrylamide.

## Figure S2. Microparticle size and morphology before and after TSG-6 loading

**Methods:** TSG-6 was loaded onto microparticles (MPs) using the same method for all other *in vitro* and *in vivo* studies. Briefly, 0.6 mg 10 wt% Hep<sup>N</sup> MPs were incubated with 1.0 µg TSG-6 for 2 hours at 4°C. Phase microscopy and ImageJ software were used to image and quantify the diameter of microparticles before and after the loading protocol.

**Results:** MPs appear to have similar morphology (Figure S2A-B) and exhibit no difference in size distribution (Figure S2C) before and after loading.

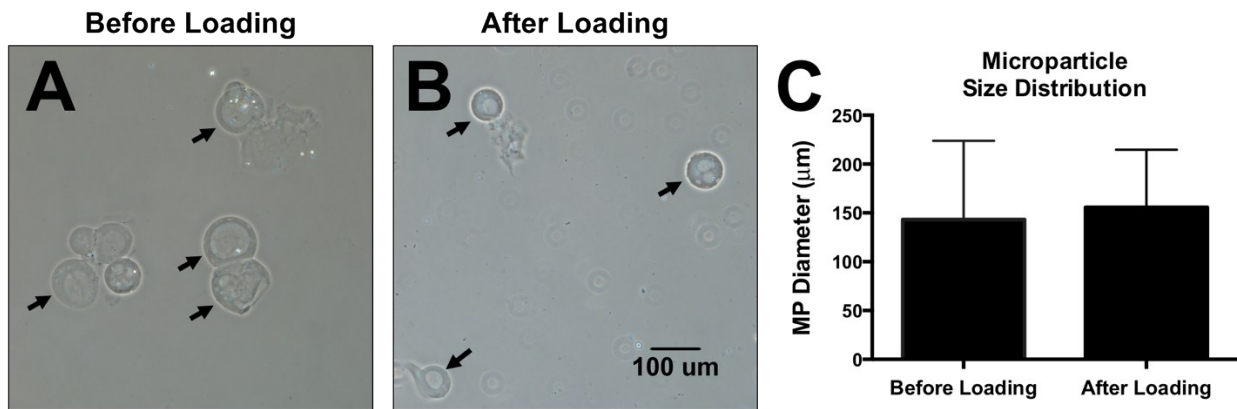

**Figure S2. Microparticle size and morphology before and after TSG-6 loading.** (A-B) 10 wt% Hep<sup>N</sup> MPs appeared similar in morphology before and after TSG-6 loading, and (C) were not significantly different in average size distribution. Before loading and after loading group were not significantly different;  $p \leq 0.05$ ; two-tailed t-test;  $n > 30$  microparticles per group; data shown as mean  $\pm$  SD.
